# Supplementary material for: HtrA4 may play a major role in inhibiting endothelial repair in pregnancy complication preeclampsia
Source: PubMed Central journal article supplement (PMC6389976; doi:10.1038/s41598-019-39565-9), 2019-02-25
Supplement: 41598_2019_39565_MOESM1_ESM.pdf [file 41598_2019_39565_MOESM1_ESM.pdf]

# **HtrA4 may play a major role in inhibiting endothelial repair in pregnancy complication preeclampsia**

Yao Wang<sup>1,2</sup>, Rebecca Lim<sup>3,4</sup> and Guiying Nie<sup>1,2,5\*</sup>

<sup>1</sup>Implantation and Placental Development Laboratory, Centre for Reproductive Health, Hudson Institute of Medical Research, Clayton, Victoria, 3168, Australia

<sup>2</sup>Department of Molecular and Translational Science, Monash University, Clayton, Victoria, 3800, Australia

<sup>3</sup>Department of Obstetrics and Gynaecology, Monash University, Clayton, Victoria, 3168, Australia

<sup>4</sup>Australian Regenerative Medicine Institute, Monash University, Clayton, Victoria, 3168, Australia

<sup>5</sup>Department of Biochemistry and Molecular Biology, Monash University, Clayton, Victoria, 3800, Australia

## G1 Phase & S Phase

- Vehicle control
- 1.5 $\mu$ g/ml HtrA4
- 3.0 $\mu$ g/ml HtrA4

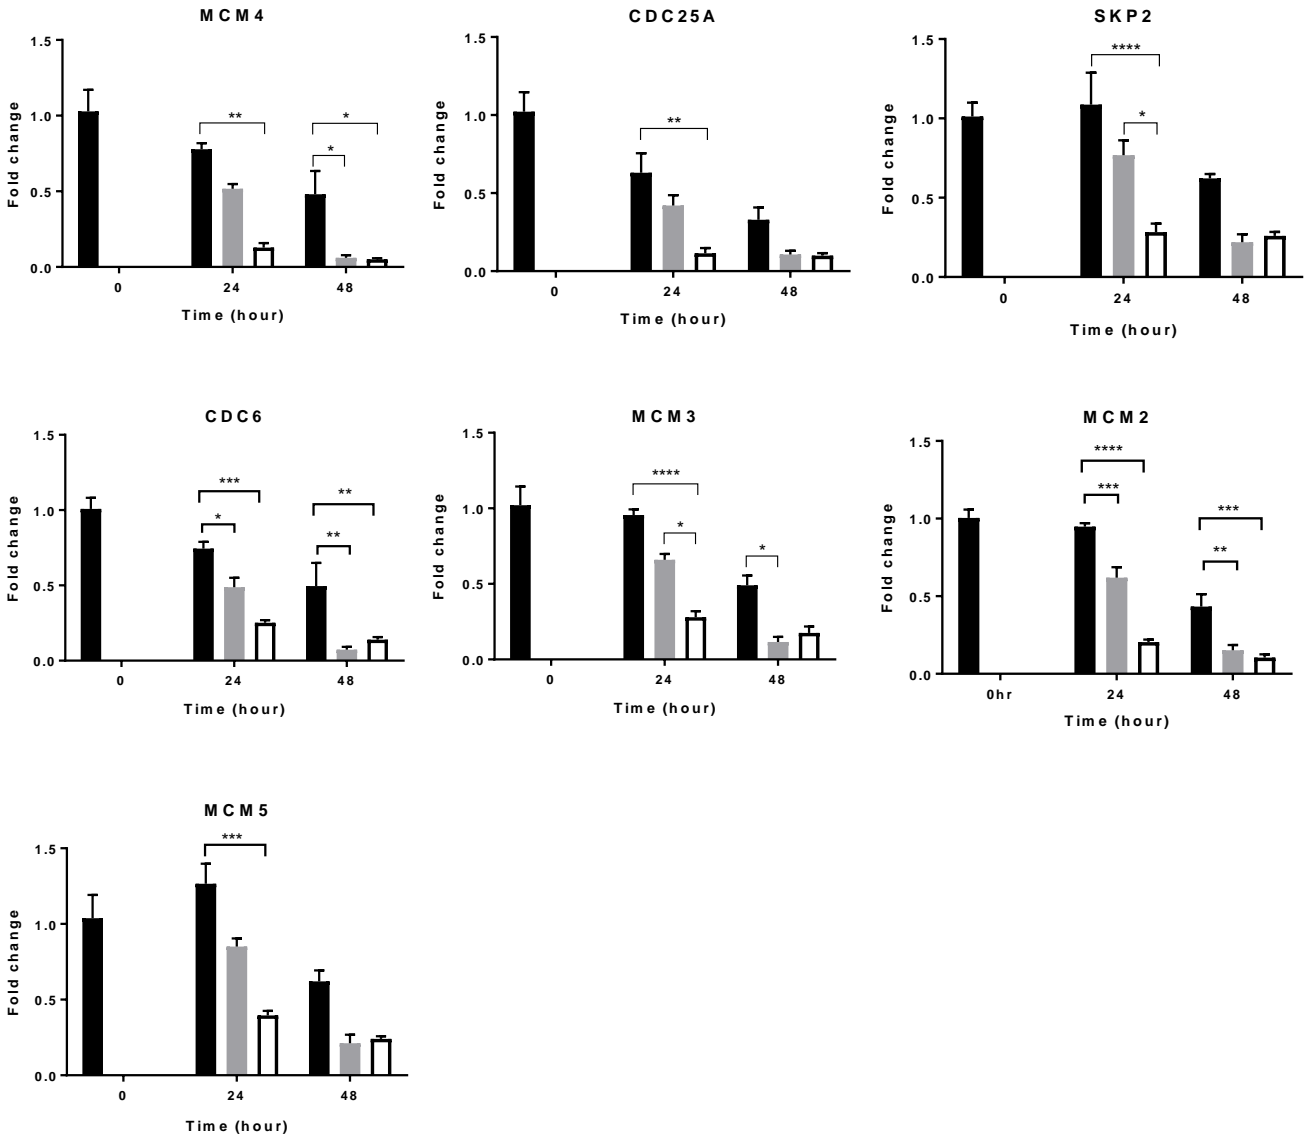

## G2 Phase & M Phase

- Vehicle control
- 1.5µg/ml HtrA4
- 3.0µg/ml HtrA4

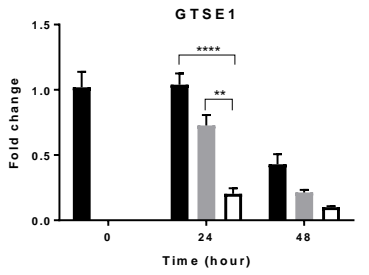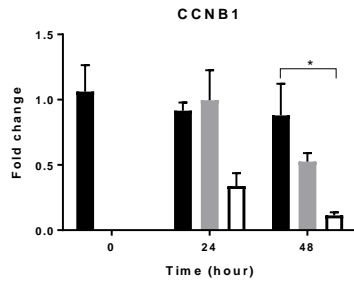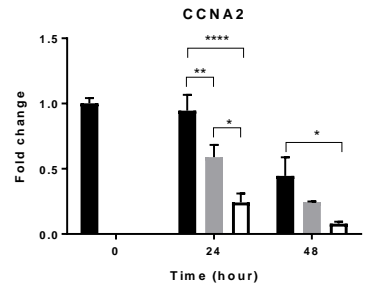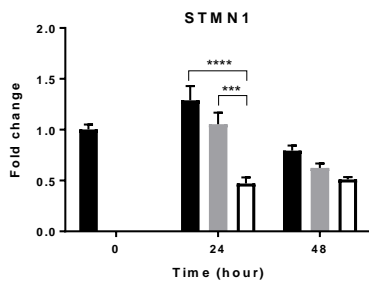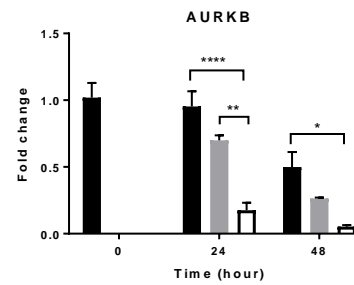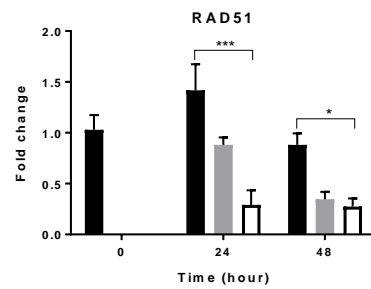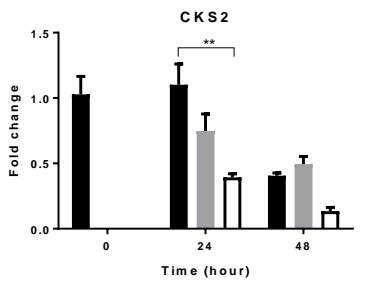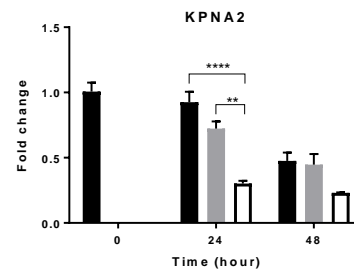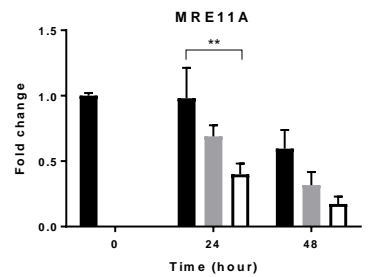

- Vehicle control
- 1.5µg/ml HtrA4
- 3.0µg/ml HtrA4

## Cell Cycle Checkpoint and Cell Cycle Arrest

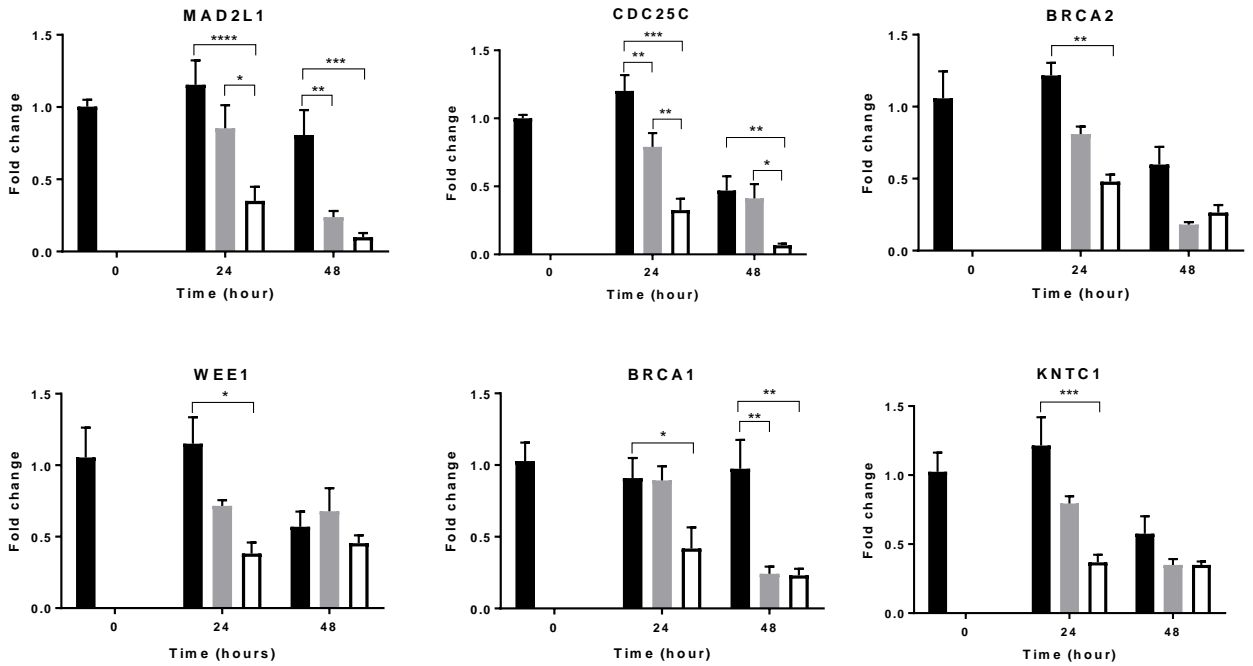

## Regulation of the Cell Cycle

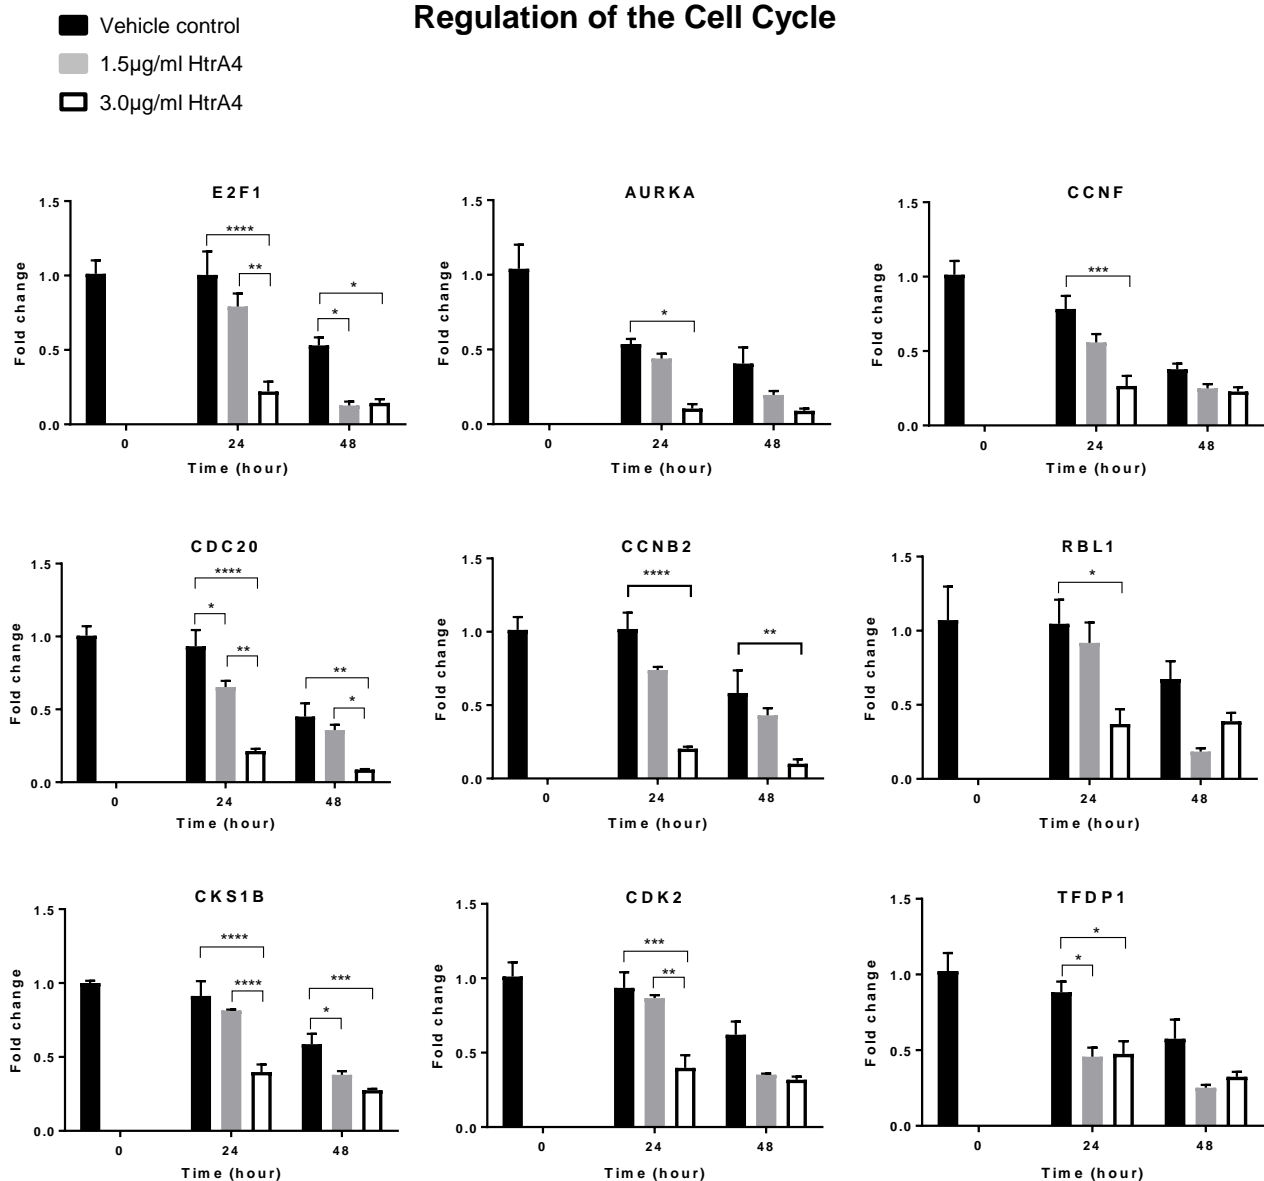

**Supplementary Figure 1.** Real-time RT-PCR validations of cell cycle genes represented in grey bar in Figure 2A. A) Genes involved in G1 and S phase. (B) Genes involved in G2 and M phase. (C) Genes involved in cell cycle checkpoint and cell cycle arrest. (D) Genes involved in regulation of the cell cycle. Cells were treated with 1.5µg/ml or 3.0µg/ml HtrA4 for 0, 24 or 48h, n=3. Data is expressed as mean  $\pm$  SD. \*p<0.05, \*\*p<0.01, \*\*\*p<0.001, \*\*\*\*p<0.0001.

**A**

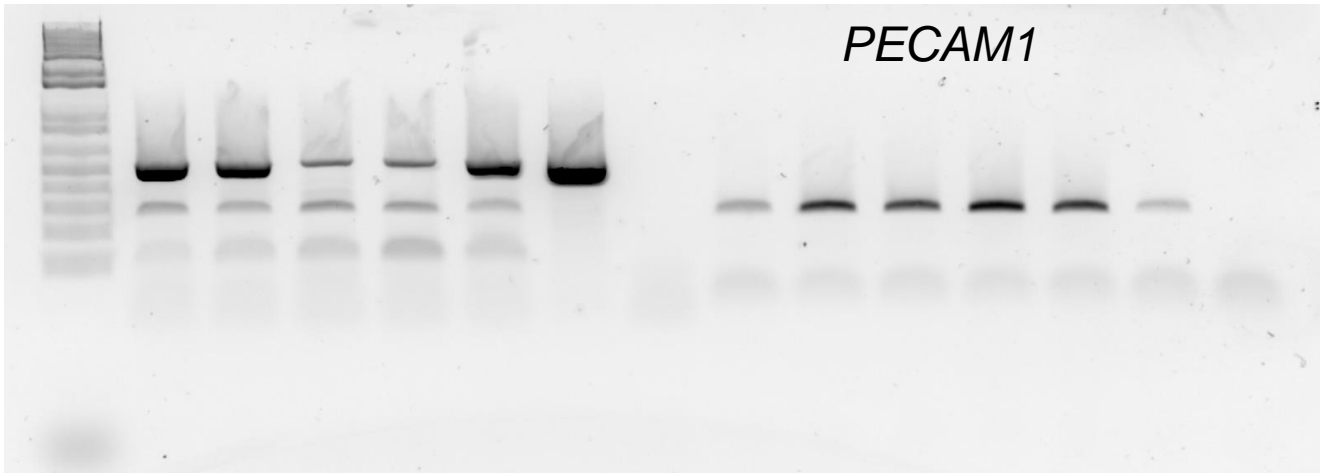

**B**

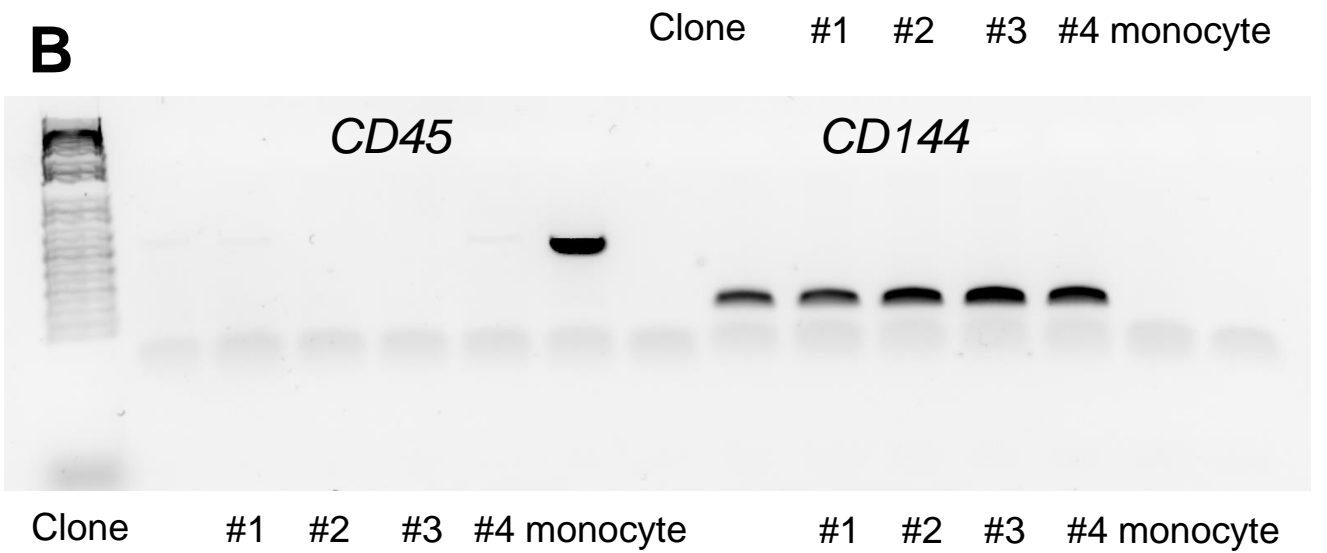

**Supplementary Figure 2.** Full PCR agarose gel electrophoresis images of Figure 3A. (A) Full image of PECAM1 on the right, including negative sample in last lane. (B) Full image of CD45 and CD144. Also included negative sample in last lane for each primer.

Supplementary Table 1

| Gene symbol | Accession Number | Primer sequence (5'→3')                                         | Product Size (bp) |
|-------------|------------------|-----------------------------------------------------------------|-------------------|
| AURKA       | NM_198433.1      | Forward TGACCCCGATCAGTTAAGGA<br>Reverse CGGACAGACACACGCATTTC    | 197               |
| AURKB       | NM_004217        | Forward TGGACCTAAAGTTCCCGCT<br>Reverse ACGCACCCGAGTGAATGACA     | 200               |
| BIRC5       | NM_001168.2      | Forward CCATCTTAAAACAGACCC<br>Reverse TAACCTGCCATTGGAACTCT      | 218               |
| BRCA1       | NM_007294        | Forward GCTGTTGCTTTCTTTGAGGT<br>Reverse CAATCAAGTCTTCACTGCC     | 196               |
| BRCA2       | NM_000059        | Forward ATGGAATGAGGTCTTTAGT<br>Reverse TCAAAAGGAAACACCACTCT     | 192               |
| CCNA2       | NM_001237.3      | Forward TGGTGGTCTGTGTTCTGTGA<br>Reverse CCATCTGTCTGTGATTTTT     | 211               |
| CCNB1       | NM_031966        | Forward TCCTTTTGGTTTACCTGGGG<br>Reverse TAGGGATTCGGTGGTAGACT    | 216               |
| CCNB2       | NM_004701        | Forward GCCAAGAATGTGGTGAAAGT<br>Reverse AGAAAAGGGCACAATGAAG     | 202               |
| CCNF        | NM_001761        | Forward CCCCCAAATGCTCTTGAACC<br>Reverse CGACAGGACGGGTCTACAGT    | 196               |
| CDC6        | NM_001254        | Forward GAACTCCTGACCCTCAAGTG<br>Reverse CCACTGTCTCCAATCTCC      | 181               |
| CDC20       | NM_001255        | Forward GGTGGCTGAACTCAAAGGTC<br>Reverse CTGAGGTGATGGGTTGGTCT    | 216               |
| CDC25A      | NM_001789        | Forward CTACTCATCCCTGCCCTCTG<br>Reverse GTCCTCTCCCCACATTTTT     | 217               |
| CDC25C      | NM_001790        | Forward TGGTGGCAGAGTCTGGAG<br>Reverse AAGAGGGGGAAACAAAGAAG      | 205               |
| CDK1        | NM_001786.4      | Forward AAAGCTAACATGAGAGCAT<br>Reverse CGAAAAGCCAAGATAAGCAACT   | 193               |
| CDK2        | NM_001798        | Forward CTGAGACAGGGATTGTGCT<br>Reverse CTATGGGGTAGGAGGTGGAC     | 164               |
| CDKN3       | NM_005192.3      | Forward ACAGCCTGCGAGACCTAAGA<br>Reverse AACACTGGTGGTTTCATTTTC   | 218               |
| CKS1B       | NM_001826        | Forward AGTAGAGCCACCACCACCAT<br>Reverse TCCGAAGTCAACACACATA     | 220               |
| CKS2        | NM_001827        | Forward CTGAAGAGGAGTGGAGGAGA<br>Reverse GCACAGGTATGGATGAAAGA    | 235               |
| E2F1        | NM_005225        | Forward GCTGTTCTTCTGCCCATAC<br>Reverse TTCACCACCCTCTGCCCA       | 222               |
| GTSE1       | NM_016426        | Forward CCTGTTTGGAGCGGGGCATC<br>Reverse TCTGGGGTTGGTGGGGGAT     | 268               |
| KNTC1       | NM_014708        | Forward AGGAGTTTGGATTTTGGCA<br>Reverse CAGAATTTACAGGGAGCAG      | 197               |
| KPNA2       | NM_002266        | Forward GCCGTGACCAACTATACCAG<br>Reverse TGCTAAGCTCCACATTCT      | 217               |
| MCM2        | NM_004526        | Forward GCGTATTCAAGCTGCTTTTG<br>Reverse GATAACTGTGGCAGTGGAT     | 193               |
| MCM3        | NM_002388        | Forward TGGGGGCACAACCTGTTTTCT<br>Reverse CATCTCGGATATTCATCTGG   | 218               |
| MCM4        | NM_182746        | Forward GCACCCAGCCTTTGTTTTAT<br>Reverse GCCAGGTAACCAAGTATTATTCC | 196               |
| MCM5        | NM_006739        | Forward ACTTCACCAAGCAGAAATAC<br>Reverse GCAGAGGTCCCAGCAACAT     | 205               |
| MAD2L1      | NM_002358        | Forward CTGTAGATGGAAAACTTGTGC<br>Reverse AAATGAAGGTCAAAGGAGC    | 214               |
| MKI67       | NM_002417.4      | Forward TTGGTACTGGGGGAGGGAGA<br>Reverse TGGGAGGCAGAAAAGTAAAA    | 188               |
| MRE11A      | NM_005591        | Forward GCACTGATGGAATCCCTCTA<br>Reverse AACAGGCTGAACCAAATGAA    | 312               |
| RAD51       | NM_002875        | Forward TGTAGCAAAGGGAAATGGGTC<br>Reverse GCAGGTAGATGGTGAAGGGC   | 159               |
| RBL1        | NM_183404        | Forward GGACCAAGTAAAGAGGAAAG<br>Reverse TGTGCGGGGAAATATAAATG    | 211               |
| SKP2        | NM_005983        | Forward ACATTTACAGCCTTTTCGTG<br>Reverse GAGAATCCAGAACACCCAGA    | 204               |
| STMN1       | NM_203401.1      | Forward AAGACGCAAGTCCCATGAAG<br>Reverse CCATTTGTGCCTCGGTT       | 173               |
| TFDP1       | NM_007111        | Forward CTAACAGCCCCAAGCAAAC<br>Reverse CTCATAGCCGCACCAAGCAT     | 220               |
| WEE1        | NM_003390        | Forward CCCTCTTTGGAATGCTGTA<br>Reverse TGTGAAAACTTGAATGTC       | 251               |
